# Supplementary material for: Measuring the competition between bimolecular charge recombination and charge transport in organic solar cells under operating conditions
Source: Royal Society of Chemistry journal article supplement (doi:10.1039/c8ee01559g), 2018-01-01
Supplement: c8ee01559g1.xlsx [file c8ee01559g1.xlsx]

## Sheet: Sheet1
Device ID	Device Name	Bottom Contact	Donor	Donor Product	Donor Lot#	Donor Mw (Da)	Donor Mn (Da)	Donor PDI	Acceptor	Acceptor Product	Blend Ratio (wt/wt)	Solvent	Additive	Solution Concentration (mg/mL)	Spin Speed (rpm)	Annealing	Additional Fabrication Details	Thickness (nm)	Top Contact	Device Area (cm^2)	J_sc (mA/cm^2)	V_oc (V)	FF	PCE (%)	Dielectric	V_int (V)	G_mp (cm^-3 s^-1)	n_mp (cm^-3)	k_mp (cm^3 s^-1)	mu_mp (cm^2 V^-1 s^-1)	ζ_mp	θ_ipda	k_ocvd (cm^3 s^-1)	θ_ocvd
T344A	P3HT #1	ITO (140 nm)/PEDOT:PSS (40 nm)	P3HT	Plextronics Plexcore OS 2100	08-10560	N/A	55000	2	PC61BM		4:3	1,2-dichlorobenzene	None	35	2000	None	None	133	Ca / Al	0.207	-3.77257	0.626982	0.60797	1.43805	3.17075	0.131831	1.89593e+21	1.51001e+16	1.49036e-12	6.05323e-05	0.0215713	1.3884	4.2796e-12	3.98679
T349A		ITO (140 nm)/PEDOT:PSS (40 nm)	P3HT	Plextronics Plexcore OS 2100	08-10560	N/A	55000	2	PC61BM		4:3	1,2-dichlorobenzene	None	35	3000	None	None	98	Ca / Al	0.204	-3.83927	0.657151	0.590383	1.48952	3.01206	0.126906	2.57073e+21	2.29947e+16	5.89613e-13	2.94297e-05	0.0166745	1.00229	4.35273e-12	7.39922
T439A		ITO (140 nm)/PEDOT:PSS (40 nm)	P3HT	Plextronics Plexcore OS 2100	08-10560	N/A	55000	2	PC61BM		4:3	1,2-dichlorobenzene	None	35	1500	None	None	148	Ca / Al	0.214	-4.45974	0.630147	0.616202	1.73171	3.0037	0.148254	1.80816e+21	1.52793e+16	6.79004e-13	7.32242e-05	0.00769631	0.499845	4.4432e-12	3.27084
T444A		ITO (140 nm)/PEDOT:PSS (40 nm)	P3HT	Plextronics Plexcore OS 2100	08-10560	N/A	55000	2	PC61BM		4:3	1,2-dichlorobenzene	None	35	2000	None	None	135	Ca / Al	0.214	-3.14886	0.647222	0.593376	1.20931	3.1122	0.137389	1.40339e+21	1.60581e+16	5.99017e-14	4.52787e-05	0.00113768	0.0721542	4.36299e-12	5.2554
T275A		ITO (140 nm)/PEDOT:PSS (40 nm)	P3HT	Plextronics Plexcore OS 2100	08-10560	N/A	55000	2	PC61BM		4:3	1,2-dichlorobenzene	None	35	1000	10 min slow dry	10s spin coat, 10 min slow dry in covered Petri dish	302	Ca / Al	0.216	-8.69245	0.571837	0.607079	3.01759	3.50546	0.153955	1.76569e+21	1.99106e+16	5.64972e-13	0.000221847	0.00246676	0.711331	2.96027e-12	3.72714
T300A	P3HT #2	ITO (140 nm)/PEDOT:PSS (40 nm)	P3HT	Plextronics Plexcore OS 2100	08-10560	N/A	55000	2	PC61BM		4:3	1,2-dichlorobenzene	None	35	1000	10 min slow dry, 150C 20 min	10s spin coat, 10 min slow dry in covered Petri dish	259	Ca / Al	0.217	-9.46972	0.571985	0.656827	3.55773	3.16215	0.134809	2.24442e+21	3.04093e+16	2.23059e-13	0.000160289	0.00121592	0.482482	2.0254e-12	4.38099
T304A		ITO (140 nm)/PEDOT:PSS (40 nm)	P3HT	Plextronics Plexcore OS 2100	08-10560	N/A	55000	2	PC61BM		4:3	1,2-dichlorobenzene	None	35	1000	10 min slow dry, 150C 20 min	10s spin coat, 10 min slow dry in covered Petri dish	267	Ca / Al	0.216	-9.26211	0.569179	0.662786	3.49407	3.16304	0.133783	2.13425e+21	2.19079e+16	4.05967e-13	0.000227907	0.00155685	0.473653	2.11819e-12	2.47135
T281A		ITO (140 nm)/PEDOT:PSS (40 nm)	P3HT	Plextronics Plexcore OS 2100	08-10560	N/A	55000	2	PC61BM		4:3	1,2-dichlorobenzene	None	35	1000	10 min slow dry, 150C 40 min	10s spin coat, 10 min slow dry in covered Petri dish	248	Ca / Al	0.215	-8.8527	0.589816	0.659283	3.44242	2.92282	0.140924	2.20422e+21	2.32577e+16	4.39014e-13	0.000180946	0.00195948	0.562951	2.06433e-12	2.64711
T286B		ITO (140 nm)/PEDOT:PSS (40 nm)	P3HT	Plextronics Plexcore OS 2100	08-10560	N/A	55000	2	PC61BM		4:3	1,2-dichlorobenzene	None	35	1000	10 min slow dry, 150C 60 min	10s spin coat, 10 min slow dry in covered Petri dish	307	Ca / Al	0.214	-8.62283	0.581618	0.628849	3.1538	3.2598	0.151642	1.72201e+21	2.31905e+16	3.64072e-13	0.000199662	0.00164245	0.607506	1.7405e-12	2.90427
T298A		ITO (140 nm)/PEDOT:PSS (40 nm)	P3HT	Plextronics Plexcore OS 2100	08-10560	N/A	55000	2	PC61BM		4:3	1,2-dichlorobenzene	None	35	1000	150C 0.5 min	None	217	Ca / Al	0.219	-7.46048	0.610692	0.661767	3.01505	2.93972	0.140314	2.10984e+21	2.48474e+16	3.59228e-13	0.000124376	0.00234611	0.551799	1.37324e-12	2.10939
T351B		ITO (140 nm)/PEDOT:PSS (40 nm)	P3HT	Plextronics Plexcore OS 2100	08-10560	N/A	55000	2	PC61BM		4:3	1,2-dichlorobenzene	None	35	2000	150C 0.5 min	None	185	Ca / Al	0.213	-5.34063	0.605766	0.607976	1.96691	3.55222	0.145236	1.76182e+21	2.18542e+16	4.34504e-13	7.76063e-05	0.00549548	0.705828	1.86776e-12	3.03407
T290A		ITO (140 nm)/PEDOT:PSS (40 nm)	P3HT	Plextronics Plexcore OS 2100	08-10560	N/A	55000	2	PC61BM		4:3	1,2-dichlorobenzene	None	35	1000	150C 20 min	None	274	Ca / Al	0.211	-8.40964	0.59443	0.655647	3.27754	3.56477	0.142549	1.88668e+21	2.79152e+16	2.61049e-13	0.000155681	0.00165168	0.563666	1.08623e-12	2.34543
T506A		ITO (140 nm)/PEDOT:PSS (40 nm)	P3HT	Plextronics Plexcore OS 2100	08-10560	N/A	55000	2	PC61BM		4:3	1,2-dichlorobenzene	None	35	1000	150C 20 min	None	198	Ca / Al	0.211	-6.57682	0.595486	0.661118	2.58921	2.87803	0.137248	2.05273e+21	3.1234e+16	2.48347e-13	8.13483e-05	0.0024278	0.628555	8.41216e-13	2.12908
T507A		ITO (140 nm)/PEDOT:PSS (40 nm)	P3HT	Plextronics Plexcore OS 2100	08-10560	N/A	55000	2	PC61BM		4:3	1,2-dichlorobenzene	None	35	1000	150C 20 min	None	301	Ca / Al	0.212	-8.19858	0.591063	0.619157	3.00036	2.94067	0.153541	1.68758e+21	3.29645e+16	2.26849e-13	0.000127144	0.00144976	0.824571	8.14535e-13	2.96074
T432A		ITO (140 nm)/PEDOT:PSS (40 nm)	PTB7	1-Material PCE-9	YY7022	115000	N/A	2.5	PC71BM		2:3	chlorobenzene	3 vol% DIO	25	1500	None	None	90	Ca / Al	0.216	-16.2129	0.736385	0.593296	7.08333	3.2184	0.209322	1.12999e+22	1.69062e+16	6.35253e-12	0.000106638	0.0529763	0.945228	2.60822e-11	3.88092
T535B	PTB7 #1	ITO (140 nm)/PEDOT:PSS (40 nm)	PTB7	1-Material PCE-9	YY7022	115000	N/A	2.5	PC71BM		2:3	chlorobenzene	None	25	1500	None	None	91	Ca / Al	0.213	-8.88782	0.737721	0.512118	3.35782	4.35029	0.200412	6.74368e+21	2.5693e+16	3.26907e-12	3.35466e-05	0.114045	3.1702	5.95316e-12	5.77311
T813B		ITO (140 nm)/PEDOT:PSS (40 nm)	PTB7	1-Material PCE-9	YY7022	115000	N/A	2.5	PC71BM		2:3	chlorobenzene	None	25	1500	None	None	98	Ca / Al	0.213	-8.49634	0.754768	0.451963	2.89833	3.48697	0.216786	6.47556e+21	7.63198e+16	4.4647e-13	9.95752e-06	0.0432014	5.72283	2.51869e-12	32.2844
T819B		ITO (140 nm)/PEDOT:PSS (40 nm)	PTB7	1-Material PCE-9	YY7022	115000	N/A	2.5	PC71BM		2:3	chlorobenzene	3 vol% DIO	25	1500	None	None	80	Ca / Al	0.222	-12.4439	0.730984	0.679115	6.17745	3.8258	0.160928	9.58401e+21	1.76624e+16	2.24955e-12	9.51208e-05	0.0250006	0.376869	1.91685e-11	3.2113
T820B	PTB7 #2	ITO (140 nm)/PEDOT:PSS (40 nm)	PTB7	1-Material PCE-9	YY7022	115000	N/A	2.5	PC71BM		2:3	chlorobenzene	3 vol% DIO	25	1000	None	None	92	Ca / Al	0.212	-15.5739	0.73204	0.64953	7.4051	3.9311	0.169775	1.03452e+22	2.0645e+16	2.54653e-12	0.000107746	0.0256725	0.564014	2.84536e-11	6.30201
T821B		ITO (140 nm)/PEDOT:PSS (40 nm)	PTB7	1-Material PCE-9	YY7022	115000	N/A	2.5	PC71BM		2:3	chlorobenzene	3 vol% DIO	25	1000	None	None	92	Ca / Al	0.215	-14.1645	0.727205	0.666286	6.86308	3.81545	0.164498	9.58235e+21	1.99532e+16	2.52466e-12	0.00010665	0.0249572	0.563096	2.71571e-11	6.05709
T824B		ITO (140 nm)/PEDOT:PSS (40 nm)	PTB7	1-Material PCE-9	YY7022	115000	N/A	2.5	PC71BM		2:3	chlorobenzene	3 vol% DIO	25	2000	None	None	63	Ca / Al	0.215	-11.0861	0.721188	0.669484	5.35264	3.29648	0.164329	1.09128e+22	1.86047e+16	2.9264e-12	6.17844e-05	0.0431433	0.488031	1.83159e-11	3.05451
SJK139B		ITO (140 nm)/PEDOT:PSS (40 nm)	PTB7-Th	1-Material PCE-10	YY10016	120000	N/A	3	PC71BM		2:3	chlorobenzene	None	30	2500	None	None	81	Al	0.226	-12.8882	0.762734	0.470641	4.62653	3.09163	0.224472	1.06118e+22	2.9933e+16	3.87516e-12	3.23229e-05	0.102418	3.36258	1.197e-11	10.3867
SJK140B	PTB7-Th #1	ITO (140 nm)/PEDOT:PSS (40 nm)	PTB7-Th	1-Material PCE-10	YY10016	120000	N/A	3	PC71BM		2:3	chlorobenzene	None	30	2500	None	None	87	Al	0.225	-12.8707	0.783038	0.473996	4.77705	3.53666	0.229834	9.80304e+21	2.93813e+16	3.68957e-12	3.47179e-05	0.103854	3.25445	1.46491e-11	12.9215
SJKA30B		ITO (140 nm)/PEDOT:PSS (40 nm)	PTB7-Th	1-Material PCE-10	YY10016	120000	N/A	3	PC71BM		2:3	chlorobenzene	None	30	1000	None	None	150	Al	0.221	-11.4139	0.769877	0.441505	3.87965	3.37928	0.238894	5.20729e+21	1.10091e+16	1.59524e-11	0.000130042	0.114544	4.35733	2.93844e-11	8.02625
SJK141A		ITO (140 nm)/PEDOT:PSS (40 nm)	PTB7-Th	1-Material PCE-10	YY10016	120000	N/A	3	PC71BM		2:3	chlorobenzene	3 vol% CN	30	1500	None	None	101	Al	0.225	-15.8551	0.798815	0.591048	7.4858	3.40701	0.202324	1.00519e+22	2.7834e+16	2.52718e-12	7.02366e-05	0.033873	1.30903	2.19076e-11	11.3477
SJK142B		ITO (140 nm)/PEDOT:PSS (40 nm)	PTB7-Th	1-Material PCE-10	YY10016	120000	N/A	3	PC71BM		2:3	chlorobenzene	3 vol% CN	30	1500	None	None	97	Al	0.225	-16.0758	0.809456	0.592916	7.71538	3.73233	0.205513	1.05202e+22	2.99758e+16	2.02103e-12	6.27585e-05	0.0332114	1.13151	2.76934e-11	15.5047
SJKA34B		ITO (140 nm)/PEDOT:PSS (40 nm)	PTB7-Th	1-Material PCE-10	YY10016	120000	N/A	3	PC71BM		2:3	chlorobenzene	3 vol% CN	30	900	None	None	152	Al	0.221	-15.4826	0.784317	0.576585	7.00164	3.49246	0.216577	6.33456e+21	9898122753999600	1.10281e-11	0.000272859	0.0390035	1.06781	6.38709e-11	6.18434
SJK161A		ITO (140 nm)/PEDOT:PSS (40 nm)	PTB7-Th	1-Material PCE-10	YY10016	120000	N/A	3	PC71BM		2:3	chlorobenzene	3 vol% DPE	30	2000	None	None	88	Al	0.222	-15.9173	0.809427	0.643651	8.29275	3.04695	0.174218	1.12554e+22	1.8021e+16	4.89457e-12	0.000114117	0.0361108	0.835831	5.02879e-11	8.58751
SJK164A		ITO (140 nm)/PEDOT:PSS (40 nm)	PTB7-Th	1-Material PCE-10	YY10016	120000	N/A	3	PC71BM		2:3	chlorobenzene	3 vol% DPE	30	1400	None	None	118	Al	0.225	-15.9546	0.79821	0.623846	7.94475	3.41191	0.189765	8.49583e+21	1.34606e+16	7.7469e-12	0.000188211	0.0388051	1.00033	4.24403e-11	5.48015
SJK253A	PTB7-Th #2	ITO (140 nm)/PEDOT:PSS (40 nm)	PTB7-Th	1-Material PCE-10	YY10016	120000	N/A	3	PC71BM		2:3	chlorobenzene	3 vol% DPE	30	1700	None	None	119	Al	0.223	-16.409	0.802597	0.640266	8.43219	3.43244	0.188764	8.51688e+21	1.24811e+16	7.12312e-12	0.000216478	0.0312082	0.728573	6.09928e-11	6.23851
SJK255A		ITO (140 nm)/PEDOT:PSS (40 nm)	PTB7-Th	1-Material PCE-10	YY10016	120000	N/A	3	PC71BM		2:3	chlorobenzene	3 vol% DPE	30	2000	None	None	114	Al	0.223	-16.4272	0.803548	0.639494	8.44136	3.50616	0.185666	8.91862e+21	1.60853e+16	4.65449e-12	0.000162707	0.0277143	0.768259	4.35254e-11	7.1842
SJKA55B		ITO (140 nm)/PEDOT:PSS (40 nm)	PPDT2FBT	Han Young Woo Group	N/A	N/A	43000	2.8	PC71BM		2:3	chlorobenzene	3 vol% DPE	28.5	3000	None	None	107	Al	0.216	-11.7677	0.745425	0.685203	6.01057	2.68589	0.169319	6.81525e+21	1.46738e+16	2.85755e-12	0.000140142	0.015133	0.453383	3.92321e-11	6.22461
SJKA56A	PPDT2FBT	ITO (140 nm)/PEDOT:PSS (40 nm)	PPDT2FBT	Han Young Woo Group	N/A	N/A	43000	2.8	PC71BM		2:3	chlorobenzene	3 vol% DPE	28.5	3500	None	None	124	Al	0.218	-11.0777	0.755539	0.691509	5.78767	2.82596	0.169705	5.52677e+21	1.13319e+16	3.76079e-12	0.000198672	0.0147814	0.432289	3.28237e-11	3.77297
HBW6D	PIPCP	ITO (140 nm)/ZnO	PIPCP	Guillermo C. Bazan Group	N/A	N/A	86000	1.6	PC61BM		1:2	chlorobenzene : chloroform (3:2)	None	18	1500	None	None	110	MoOx / Ag	0.063	-15.0372	0.901216	0.490339	6.64495	2.95591	0.262385	8.71429e+21	5462788342280720	6.98369e-11	0.000249081	0.229004	2.08606	1.45497e-10	1.88565
